# Supplementary material
Source: PubMed Central journal article supplement (PMC4133769)

**Supplement Figure 1.** Rearranged IgH DNA sequence and positions of tissue and plasma primers used in Patient #1.

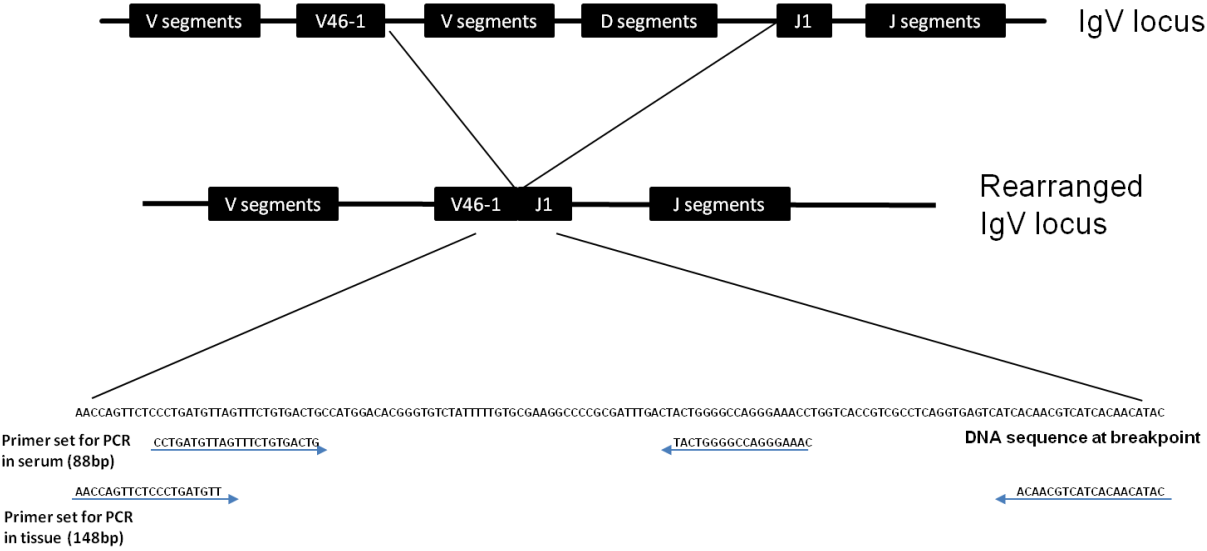

Supplement: NIHMS561872-supplement-Suppl_1.pdf [file NIHMS561872-supplement-Suppl_1.pdf]
