# Supplementary material
Source: PubMed Central journal article supplement (PMC4133769)
Supplement: NIHMS561872-supplement-Table_1.pdf [file NIHMS561872-supplement-Table_1.pdf]

**Supplement Table 1.** Primers used in lymphoma tissue and in corresponding plasma samples

| Patient ID | Forward primer tissue     | Reverse primer tissue   | Forward primer plasma      | Reverse primer plasma |
|------------|---------------------------|-------------------------|----------------------------|-----------------------|
| 1          | M13-AAACCAGTTCTCCCTGATGT  | GTATGTTGTGATGACTCACCTGA | CCTGATGTTAGTTCTGTGACTG     | GTTCCCTGGCCCCAGTA     |
| 2          | M13-CTGGGAAGCTCCTCCTGAC   | AGGAGCCCCGGACATTAT      | CTCCAGTTCAGGTGTGGTT        | TTGGCCCCAGATATCAGTACA |
| 3          | M13-CCATCTCCAGAGACAACCTCA | CCTGAAGAGACGGTGACCAG    | TACTGTGCGGGCGATGTTAT       | ACCTGAAGAGACGGTGACCA  |
| 4          | M13-CCTGGCGGTAGGTTTGAAGT  | CCCCAGAGATCGAAGTACCA    | TAGTAGGGTTGCAACTAAACATACGC | GGCCCCAGAGATCGAAGT    |
| 5          | N/A                       | N/A                     | N/A                        | N/A                   |

M13:GTAAAACGACGGCCAGT
